# Supplementary material for: Genome‐wide genetic variation discovery in Chinese Taihu pig breeds using next generation sequencing
Source: PubMed Central journal article supplement — Anim Genet. 2016 Jul 27;48(1):38–47. doi: 10.1111/age.12465 (PMC5248613; doi:10.1111/age.12465), 2016-07-27
Supplement: AGE-48-38-s001.pdf [file AGE-48-38-s001.pdf]

**Figure S1** Sequencing data summary: (a) sequencing quality of the raw and filtered reads from R1 (5'), (b) sequencing quality of raw and filtered reads from R2 (3'), (c) distribution of the average good reads for individuals within a population.

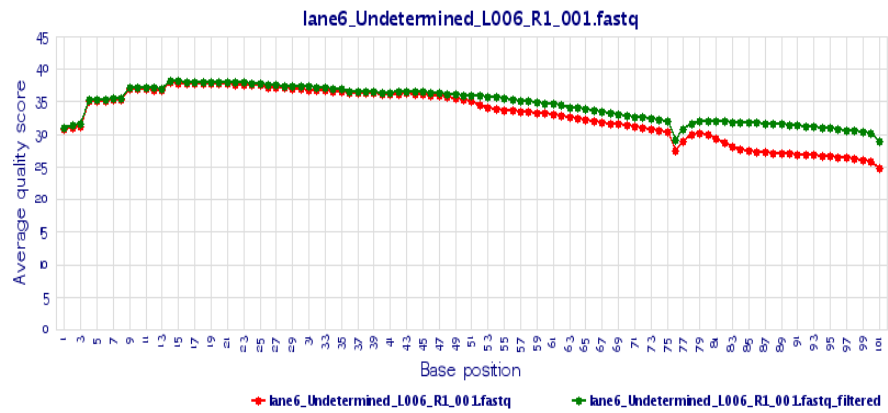

(a)

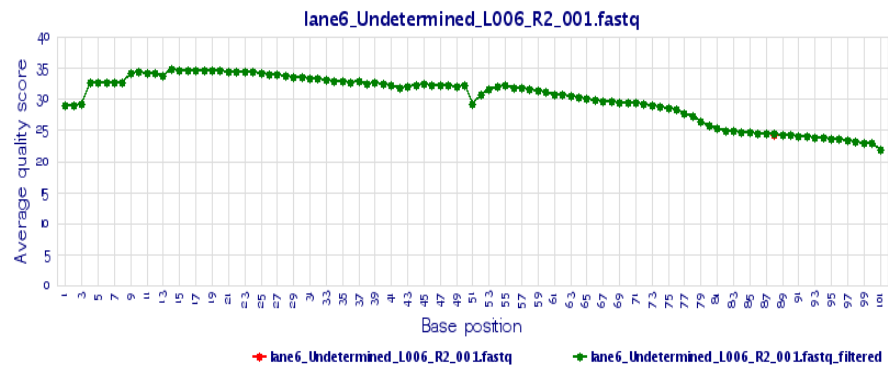

(b)

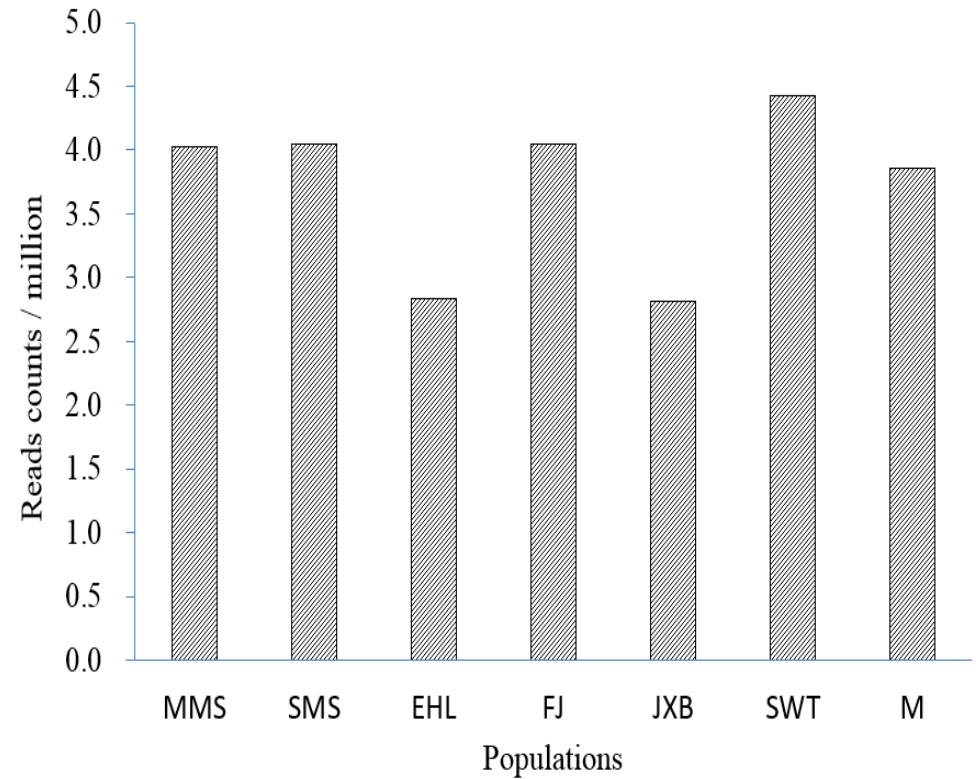

(c)
