# Supplementary material for: Genome‐wide genetic variation discovery in Chinese Taihu pig breeds using next generation sequencing
Source: PubMed Central journal article supplement — Anim Genet. 2016 Jul 27;48(1):38–47. doi: 10.1111/age.12465 (PMC5248613; doi:10.1111/age.12465), 2016-07-27
Supplement: AGE-48-38-s007.pdf [file AGE-48-38-s007.pdf]

**Table S4** Breed-specific SNP distributions when comparing two populations

| <b>Population</b>    | <b>Middle Meishan</b> | <b>Shawutou</b> | <b>Erhualian</b> | <b>Mi</b> | <b>Fengjing</b> | <b>Jiaxing Black</b> |
|----------------------|-----------------------|-----------------|------------------|-----------|-----------------|----------------------|
| <b>Shawutou</b>      | 18,855                |                 |                  |           |                 |                      |
| <b>Erhualian</b>     | 18,680                | 19,659          |                  |           |                 |                      |
| <b>Mi</b>            | 19,027                | 19,654          | <b>15,407</b>    |           |                 |                      |
| <b>Fengjing</b>      | 29,769                | 28,565          | 29,905           | 31,552    |                 |                      |
| <b>Jiaxing Black</b> | 25,880                | 25,151          | 25,294           | 25,265    | 30,060          |                      |
| <b>Small Meishan</b> | 19,928                | 22,665          | 22,996           | 22,215    | <b>32,586</b>   | 28,926               |
