# Supplementary material for: Genome‐wide genetic variation discovery in Chinese Taihu pig breeds using next generation sequencing
Source: PubMed Central journal article supplement — Anim Genet. 2016 Jul 27;48(1):38–47. doi: 10.1111/age.12465 (PMC5248613; doi:10.1111/age.12465), 2016-07-27
Supplement: AGE-48-38-s008.pdf [file AGE-48-38-s008.pdf]

**Table S5** Functional enrichment of genes with large-effect mutation variants.

| <b>Mutation Type</b> | <b>Category</b>                                        | <b>Term</b>                              | <b>Count</b> | <b>P-value</b> |
|----------------------|--------------------------------------------------------|------------------------------------------|--------------|----------------|
| <b>SNP</b>           | KEGG_PATHWAY                                           | hsa00590:Arachidonic acid metabolism     | 18           | 2.47E-07       |
|                      | KEGG_PATHWAY                                           | hsa04512:ECM-receptor interaction        | 14           | 7.58E-03       |
|                      | KEGG_PATHWAY                                           | hsa04510:Focal adhesion                  | 25           | 1.13E-02       |
|                      | KEGG_PATHWAY                                           | hsa00591:Linoleic acid metabolism        | 7            | 1.41E-02       |
|                      | GOTERM_MF_2                                            | GO:0043167~ion binding                   | 359          | 1.08E-05       |
|                      | GOTERM_CC_2                                            | GO:0044425~membrane part                 | 512          | 3.67E-05       |
|                      | GOTERM_MF_2                                            | GO:0046906~tetrapyrrole binding          | 23           | 8.38E-05       |
|                      | GOTERM_CC_2                                            | GO:0031012~extracellular matrix          | 43           | 1.85E-04       |
|                      | GOTERM_CC_2                                            | GO:0009986~cell surface                  | 43           | 2.24E-04       |
|                      | GOTERM_CC_2                                            | GO:0016020~membrane                      | 552          | 2.34E-04       |
|                      | GOTERM_MF_2                                            | GO:0019825~oxygen binding                | 11           | 6.19E-04       |
|                      | GOTERM_BP_2                                            | GO:0007155~cell adhesion                 | 73           | 6.38E-04       |
|                      | GOTERM_BP_2                                            | GO:0045058~T cell selection              | 7            | 1.45E-03       |
|                      | GOTERM_BP_2                                            | GO:0009605~response to external stimulus | 86           | 4.35E-03       |
|                      | GOTERM_CC_2                                            | GO:0044420~extracellular matrix part     | 17           | 5.89E-03       |
|                      | GOTERM_CC_2                                            | GO:0000267~cell fraction                 | 96           | 6.38E-03       |
|                      | GOTERM_BP_2                                            | GO:0016044~membrane organization         | 40           | 1.12E-02       |
|                      | GOTERM_MF_2                                            | GO:0001871~pattern binding               | 20           | 1.13E-02       |
|                      | GOTERM_BP_2                                            | GO:0006949~syncytium formation           | 5            | 1.37E-02       |
|                      | GOTERM_MF_2                                            | GO:0030246~carbohydrate binding          | 37           | 1.54E-02       |
| GOTERM_MF_2          | GO:0005201~extracellular matrix structural constituent | 13                                       | 1.63E-02     |                |
| GOTERM_MF_2          | GO:0043176~amine binding                               | 15                                       | 2.12E-02     |                |
| <b>Indel</b>         | KEGG_PATHWAY                                           | hsa05200:Pathways in cancer              | 64           | 4.18E-04       |
|                      | KEGG_PATHWAY                                           | hsa00562:Inositol phosphate metabolism   | 16           | 2.39E-03       |
|                      | KEGG_PATHWAY                                           | hsa04020:Calcium signaling pathway       | 37           | 2.39E-03       |

---

|              |                                                                     |      |          |
|--------------|---------------------------------------------------------------------|------|----------|
| KEGG_PATHWAY | hsa04070:Phosphatidylinositol signaling system                      | 19   | 4.56E-03 |
| KEGG_PATHWAY | hsa05220:Chronic myeloid leukemia                                   | 18   | 1.20E-02 |
| KEGG_PATHWAY | hsa04510:Focal adhesion                                             | 38   | 1.26E-02 |
| KEGG_PATHWAY | hsa04810:Regulation of actin cytoskeleton                           | 40   | 1.34E-02 |
| KEGG_PATHWAY | hsa05222:Small cell lung cancer                                     | 19   | 1.75E-02 |
| KEGG_PATHWAY | hsa05414:Dilated cardiomyopathy                                     | 20   | 2.17E-02 |
| GOTERM_MF_2  | GO:0005515~protein binding                                          | 1224 | 4.35E-14 |
| GOTERM_MF_2  | GO:0060589~nucleoside-triphosphatase regulator activity             | 107  | 2.90E-12 |
| GOTERM_MF_2  | GO:0008047~enzyme activator activity                                | 80   | 9.90E-08 |
| GOTERM_MF_2  | GO:0001882~nucleoside binding                                       | 279  | 3.21E-07 |
| GOTERM_BP_2  | GO:0051234~establishment of localization                            | 412  | 2.38E-05 |
| GOTERM_MF_2  | GO:0043167~ion binding                                              | 634  | 2.98E-05 |
| GOTERM_BP_2  | GO:0048856~anatomical structure development                         | 392  | 4.16E-05 |
| GOTERM_BP_2  | GO:0006810~transport                                                | 405  | 5.38E-05 |
| GOTERM_BP_2  | GO:0007275~multicellular organismal development                     | 436  | 8.66E-05 |
| GOTERM_BP_2  | GO:0006996~organelle organization                                   | 218  | 1.66E-04 |
| GOTERM_BP_2  | GO:0009653~anatomical structure morphogenesis                       | 198  | 1.98E-04 |
| GOTERM_MF_2  | GO:0000166~nucleotide binding                                       | 349  | 2.13E-04 |
| GOTERM_MF_2  | GO:0003712~transcription cofactor activity                          | 72   | 3.15E-04 |
| GOTERM_BP_2  | GO:0048518~positive regulation of biological process                | 313  | 5.27E-04 |
| GOTERM_MF_2  | GO:0016564~transcription repressor activity                         | 63   | 6.91E-04 |
| GOTERM_BP_2  | GO:0055085~transmembrane transport                                  | 101  | 9.20E-04 |
| GOTERM_BP_2  | GO:0048869~cellular developmental process                           | 264  | 1.16E-03 |
| GOTERM_BP_2  | GO:0065009~regulation of molecular function                         | 159  | 1.27E-03 |
| GOTERM_BP_2  | GO:0048646~anatomical structure formation involved in morphogenesis | 67   | 1.30E-03 |
| GOTERM_BP_2  | GO:0048522~positive regulation of cellular process                  | 283  | 1.42E-03 |
| GOTERM_CC_2  | GO:0043234~protein complex                                          | 392  | 1.86E-03 |

---

|                  |              |                                                          |      |          |
|------------------|--------------|----------------------------------------------------------|------|----------|
|                  | GOTERM_MF_2  | GO:0016740~transferase activity                          | 268  | 3.37E-03 |
|                  | GOTERM_BP_2  | GO:0050793~regulation of developmental process           | 113  | 3.39E-03 |
|                  | GOTERM_CC_2  | GO:0042995~cell projection                               | 118  | 4.01E-03 |
|                  | GOTERM_BP_2  | GO:0007155~cell adhesion                                 | 116  | 4.37E-03 |
|                  | GOTERM_MF_2  | GO:0022857~transmembrane transporter activity            | 146  | 5.48E-03 |
|                  | GOTERM_BP_2  | GO:0007049~cell cycle                                    | 126  | 5.92E-03 |
|                  | GOTERM_MF_2  | GO:0022892~substrate-specific transporter activity       | 154  | 6.54E-03 |
|                  | GOTERM_BP_2  | GO:0048519~negative regulation of biological process     | 271  | 6.60E-03 |
|                  | GOTERM_BP_2  | GO:0051128~regulation of cellular component organization | 79   | 7.21E-03 |
|                  | GOTERM_CC_2  | GO:0016020~membrane                                      | 1018 | 7.34E-03 |
|                  | GOTERM_CC_2  | GO:0000267~cell fraction                                 | 172  | 7.92E-03 |
|                  | GOTERM_BP_2  | GO:0016044~membrane organization                         | 67   | 8.76E-03 |
|                  | GOTERM_CC_2  | GO:0044420~extracellular matrix part                     | 26   | 1.02E-02 |
|                  | GOTERM_BP_2  | GO:0009790~embryonic development                         | 94   | 1.07E-02 |
|                  | GOTERM_CC_2  | GO:0043233~organelle lumen                               | 275  | 1.08E-02 |
|                  | GOTERM_BP_2  | GO:0007017~microtubule-based process                     | 47   | 1.13E-02 |
|                  | GOTERM_MF_2  | GO:0016563~transcription activator activity              | 71   | 1.17E-02 |
|                  | GOTERM_BP_2  | GO:0048523~negative regulation of cellular process       | 247  | 1.23E-02 |
|                  | GOTERM_BP_2  | GO:0070271~protein complex biogenesis                    | 84   | 1.39E-02 |
|                  | GOTERM_BP_2  | GO:0050794~regulation of cellular process                | 933  | 1.43E-02 |
|                  | GOTERM_BP_2  | GO:0009893~positive regulation of metabolic process      | 143  | 1.57E-02 |
|                  | GOTERM_BP_2  | GO:0050789~regulation of biological process              | 969  | 1.68E-02 |
|                  | GOTERM_CC_2  | GO:0009986~cell surface                                  | 61   | 1.96E-02 |
|                  | GOTERM_BP_2  | GO:0051301~cell division                                 | 52   | 2.01E-02 |
|                  | GOTERM_BP_2  | GO:0009892~negative regulation of metabolic process      | 122  | 2.05E-02 |
|                  | GOTERM_BP_2  | GO:0009056~catabolic process                             | 188  | 2.20E-02 |
| <b>Insertion</b> | KEGG_PATHWAY | hsa00240:Pyrimidine metabolism                           | 9    | 1.19E-02 |
|                  | KEGG_PATHWAY | hsa02010:ABC transporters                                | 6    | 1.35E-02 |

|                 |              |                                                          |     |          |
|-----------------|--------------|----------------------------------------------------------|-----|----------|
|                 | KEGG_PATHWAY | hsa04144:Endocytosis                                     | 13  | 1.65E-02 |
|                 | GOTERM_BP_2  | GO:0006996~organelle organization                        | 77  | 3.17E-06 |
|                 | GOTERM_CC_2  | GO:0043228~non-membrane-bounded organelle                | 123 | 1.57E-04 |
|                 | GOTERM_BP_2  | GO:0030029~actin filament-based process                  | 21  | 2.03E-04 |
|                 | GOTERM_MF_2  | GO:0001882~nucleoside binding                            | 81  | 3.56E-04 |
|                 | GOTERM_CC_2  | GO:0005622~intracellular                                 | 415 | 4.16E-04 |
|                 | GOTERM_MF_2  | GO:0060589~nucleoside-triphosphatase regulator activity  | 29  | 4.50E-04 |
|                 | GOTERM_BP_2  | GO:0007017~microtubule-based process                     | 20  | 9.95E-04 |
|                 | GOTERM_CC_2  | GO:0044424~intracellular part                            | 400 | 1.21E-03 |
|                 | GOTERM_MF_2  | GO:0016874~ligase activity                               | 26  | 1.94E-03 |
|                 | GOTERM_MF_2  | GO:0016787~hydrolase activity                            | 103 | 2.08E-03 |
|                 | GOTERM_MF_2  | GO:0000166~nucleotide binding                            | 101 | 2.56E-03 |
|                 | GOTERM_CC_2  | GO:0045178~basal part of cell                            | 6   | 3.38E-03 |
|                 | GOTERM_CC_2  | GO:0044446~intracellular organelle part                  | 175 | 3.81E-03 |
|                 | GOTERM_CC_2  | GO:0044422~organelle part                                | 175 | 4.97E-03 |
|                 | GOTERM_BP_2  | GO:0022402~cell cycle process                            | 32  | 5.48E-03 |
|                 | GOTERM_CC_2  | GO:0043234~protein complex                               | 113 | 5.79E-03 |
|                 | GOTERM_MF_2  | GO:0005515~protein binding                               | 307 | 6.54E-03 |
|                 | GOTERM_CC_2  | GO:0000267~cell fraction                                 | 53  | 1.02E-02 |
|                 | GOTERM_CC_2  | GO:0043233~organelle lumen                               | 80  | 1.90E-02 |
|                 | GOTERM_BP_2  | GO:0043170~macromolecule metabolic process               | 216 | 1.99E-02 |
|                 | GOTERM_BP_2  | GO:0007049~cell cycle                                    | 38  | 2.16E-02 |
|                 | GOTERM_BP_2  | GO:0051128~regulation of cellular component organization | 25  | 2.27E-02 |
|                 | GOTERM_CC_2  | GO:0043229~intracellular organelle                       | 334 | 2.36E-02 |
| <b>Deletion</b> | KEGG_PATHWAY | hsa04144:Endocytosis                                     | 19  | 5.25E-03 |
|                 | KEGG_PATHWAY | hsa00970:Aminoacyl-tRNA biosynthesis                     | 7   | 1.62E-02 |
|                 | GOTERM_MF_2  | GO:0060589~nucleoside-triphosphatase regulator activity  | 46  | 1.03E-06 |
|                 | GOTERM_MF_2  | GO:0001882~nucleoside binding                            | 122 | 4.75E-06 |

|            |             |                                                          |     |          |
|------------|-------------|----------------------------------------------------------|-----|----------|
|            | GOTERM_BP_2 | GO:0006996~organelle organization                        | 101 | 2.94E-05 |
|            | GOTERM_CC_2 | GO:0043228~non-membrane-bounded organelle                | 175 | 3.09E-05 |
|            | GOTERM_CC_2 | GO:0042995~cell projection                               | 59  | 1.29E-04 |
|            | GOTERM_MF_2 | GO:0000166~nucleotide binding                            | 151 | 1.50E-04 |
|            | GOTERM_CC_2 | GO:0005622~intracellular                                 | 599 | 2.99E-04 |
|            | GOTERM_MF_2 | GO:0005515~protein binding                               | 458 | 5.11E-04 |
|            | GOTERM_BP_2 | GO:0030029~actin filament-based process                  | 26  | 5.12E-04 |
|            | GOTERM_CC_2 | GO:0044422~organelle part                                | 255 | 9.24E-04 |
|            | GOTERM_CC_2 | GO:0000267~cell fraction                                 | 79  | 9.39E-04 |
|            | GOTERM_BP_2 | GO:0007017~microtubule-based process                     | 26  | 1.04E-03 |
|            | GOTERM_CC_2 | GO:0044446~intracellular organelle part                  | 252 | 1.43E-03 |
|            | GOTERM_BP_2 | GO:0022402~cell cycle process                            | 46  | 1.59E-03 |
|            | GOTERM_BP_2 | GO:0030030~cell projection organization                  | 33  | 1.94E-03 |
|            | GOTERM_CC_2 | GO:0044424~intracellular part                            | 573 | 3.04E-03 |
|            | GOTERM_MF_2 | GO:0008047~enzyme activator activity                     | 29  | 6.52E-03 |
|            | GOTERM_CC_2 | GO:0043234~protein complex                               | 158 | 7.05E-03 |
|            | GOTERM_MF_2 | GO:0016874~ligase activity                               | 32  | 8.84E-03 |
|            | GOTERM_MF_2 | GO:0016740~transferase activity                          | 111 | 9.33E-03 |
|            | GOTERM_MF_2 | GO:0016787~hydrolase activity                            | 140 | 1.00E-02 |
|            | GOTERM_CC_2 | GO:0044463~cell projection part                          | 21  | 1.55E-02 |
|            | GOTERM_BP_2 | GO:0051128~regulation of cellular component organization | 35  | 1.56E-02 |
|            | GOTERM_CC_2 | GO:0045178~basal part of cell                            | 6   | 1.63E-02 |
|            | GOTERM_CC_2 | GO:0043233~organelle lumen                               | 112 | 1.97E-02 |
|            | GOTERM_BP_2 | GO:0051641~cellular localization                         | 62  | 2.03E-02 |
| <b>CNV</b> | GOTERM_CC_2 | GO:0044456~synapse part                                  | 9   | 1.53E-03 |
|            | GOTERM_CC_2 | GO:0008021~synaptic vesicle                              | 4   | 2.96E-02 |
|            | GOTERM_CC_2 | GO:0045211~postsynaptic membrane                         | 5   | 3.19E-02 |
