# Supplementary figures and images for: Genome‐wide genetic variation discovery in Chinese Taihu pig breeds using next generation sequencing
Source: PubMed Central journal article supplement — Anim Genet. 2016 Jul 27;48(1):38–47. doi: 10.1111/age.12465 (PMC5248613; doi:10.1111/age.12465), 2016-07-27

**Figure S2** Probability density of MAF.

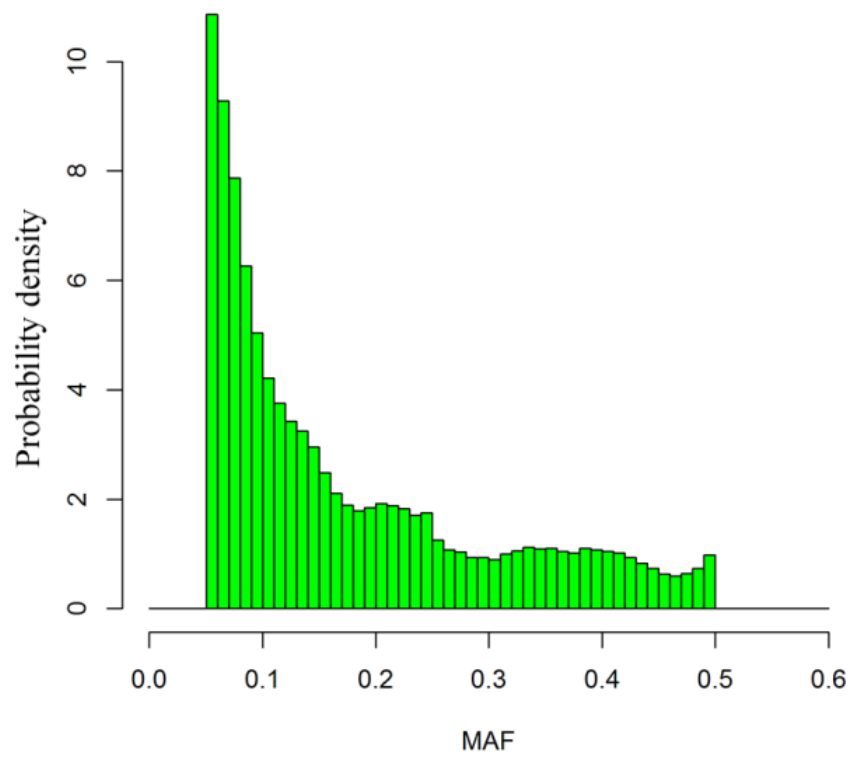

Supplement: AGE-48-38-s002.pdf [file AGE-48-38-s002.pdf]

**Figure S3** Distribution of MAF across each breed.

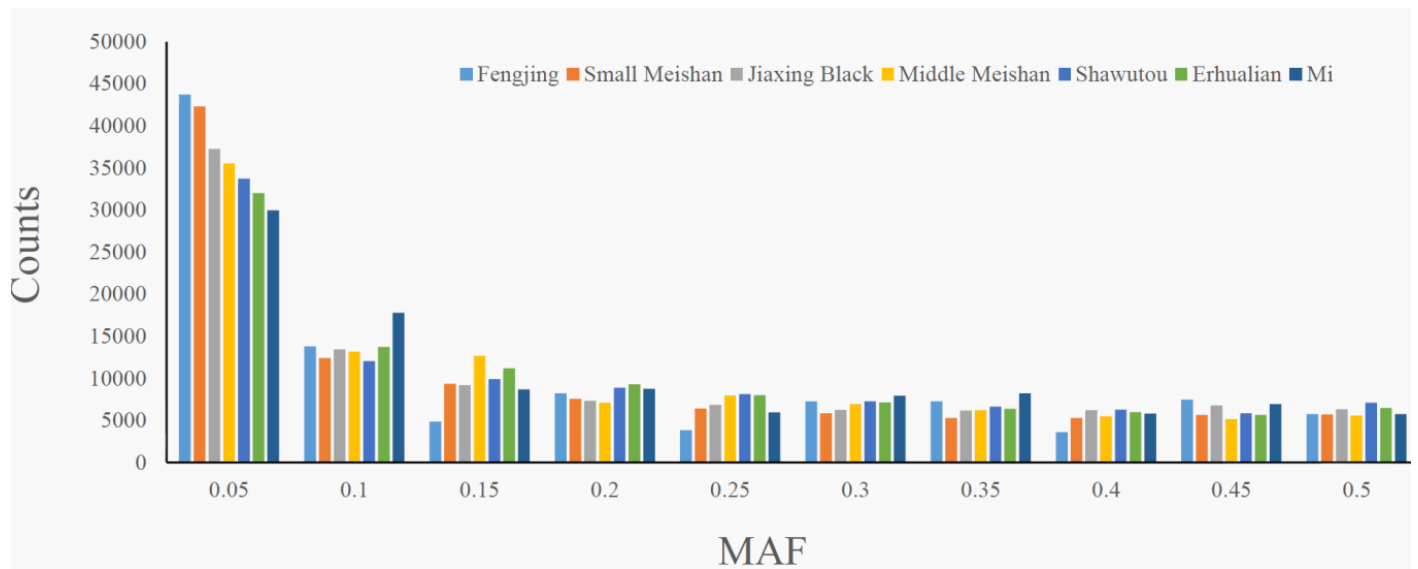

Supplement: AGE-48-38-s003.pdf [file AGE-48-38-s003.pdf]
